# Supplementary material for: Bioactivity of Oral Linaclotide in Human Colorectum for Cancer Chemoprevention
Source: Oxford University Press journal article supplement (doi:10.1158/1940-6207.capr-16-0286), 2017-04-10
Supplement: 19406207capr160286-sup-174208_2_supp_3947120_cnjmlj.docx [file 19406207capr160286-sup-174208_2_supp_3947120_cnjmlj.docx]

**Supplementary Table 1. Baseline Physical Exam**

|  | Linaclotide (N=12) | Placebo (N=12) | Total (N=24) | p value |
| --- | --- | --- | --- | --- |
| **BMI** |  |  |  | 0.041 |
| N | 12 | 12 | 24 |  |
| Mean (SD) | 29.2 (3.1) | 26.7 (2.5) | 28.0 (3.0) |  |
| Median | 29.8 | 26.4 | 27.7 |  |
| Q1, Q3 | 27.0, 32.0 | 25.0, 28.7 | 26.2, 30.1 |  |
| Range | (23.3-33.1) | (22.5-31.2) | (22.5-33.1) |  |
|  |  |  |  |  |
| **Baseline ECG Result** |  |  |  | 1.002 |
| Normal | 8 (66.7%) | 9 (75.0%) | 17 (70.8%) |  |
| Abnormal- not clinically   significant | 4 (33.3%) | 3 (25.0%) | 7 (29.2%) |  |
|  |  |  |  |  |
| **Performance Status** |  |  |  |  |
| 0 | 12 (100.0%) | 12 (100.0%) | 24 (100.0%) |  |
|  |  |  |  |  |
| **Does the subject   have any allergies?** |  |  |  |  |
| No | 12 (100.0%) | 12 (100.0%) | 24 (100.0%) |  |
| 1Wilcoxon    2Fisher Exact | | | | |
