# Supplementary material for: Bioactivity of Oral Linaclotide in Human Colorectum for Cancer Chemoprevention
Source: Oxford University Press journal article supplement (doi:10.1158/1940-6207.capr-16-0286), 2017-04-10
Supplement: 19406207capr160286-sup-174208_2_supp_3947121_wnjmlj.docx [file 19406207capr160286-sup-174208_2_supp_3947121_wnjmlj.docx]

**Supplementary Table 7. Post intervention colonoscopy/endoscopy results**

|  | Linaclotide (N=12) | Placebo (N=12) | Total (N=24) | p  value |
| --- | --- | --- | --- | --- |
| **Was the bowel preparation adequate?** |  |  |  |  |
| Yes | 12 (100.0%) | 12 (100.0%) | 24 (100.0%) |  |
| **Results of Colonoscopy** |  |  |  | 1.001 |
| Normal | 9 (75.0%) | 9 (75.0%) | 18 (75.0%) |  |
| Abnormal | 2 (16.7%) | 2 (16.7%) | 4 (16.7%) |  |
| Other | 1 (8.3%) | 1 (8.3%) | 2 (8.3%) |  |
| **Number of 2-4mm polyps** |  |  |  | 0.172 |
| N | 12 | 12 | 24 |  |
| Mean (SD) | 0.0 (0.0) | 0.2 (0.4) | 0.1 (0.3) |  |
| Median | 0.0 | 0.0 | 0.0 |  |
| Q1, Q3 | 0.0, 0.0 | 0.0, 0.0 | 0.0, 0.0 |  |
| Range | (0.0-0.0) | (0.0-1.0) | (0.0-1.0) |  |
| **Number of 5-9mm polyps** |  |  |  | 1.00 |
| N | 12 | 12 | 24 |  |
| Mean (SD) | 0.0 (0.0) | 0.0 (0.0) | 0.0 (0.0) |  |
| Median | 0.0 | 0.0 | 0.0 |  |
| Q1, Q3 | 0.0, 0.0 | 0.0, 0.0 | 0.0, 0.0 |  |
| Range | (0.0-0.0) | (0.0-0.0) | (0.0-0.0) |  |
| **Number of ≥ 10mm polyps** |  |  |  | 1.002 |
| N | 12 | 12 | 24 |  |
| Mean (SD) | 0.0 (0.0) | 0.0 (0.0) | 0.0 (0.0) |  |
| Median | 0.0 | 0.0 | 0.0 |  |
| Q1, Q3 | 0.0, 0.0 | 0.0, 0.0 | 0.0, 0.0 |  |
| Range | (0.0-0.0) | (0.0-0.0) | (0.0-0.0) |  |
| **Were all rectal polyps >2mm removed?** |  |  |  |  |
| Missing | 12 | 10 | 22 |  |
| Yes | 0 (0.0%) | 2 (100.0%) | 2 (100.0%) |  |
| 1Fisher Exact    2Wilcoxon | | | | |
