# Supplementary material for: Bioactivity of Oral Linaclotide in Human Colorectum for Cancer Chemoprevention
Source: Oxford University Press journal article supplement (doi:10.1158/1940-6207.capr-16-0286), 2017-04-10
Supplement: 19406207capr160286-sup-174208_2_supp_3947123_cnjmlj.docx [file 19406207capr160286-sup-174208_2_supp_3947123_cnjmlj.docx]

**Supplementary Table 2. Pre-Intervention Colonoscopy/Endoscopy Results**

|  | Linaclotide (N=12) | Placebo (N=12) | Total (N=24) | p value |
| --- | --- | --- | --- | --- |
| **Bowel Preparation** |  |  |  | 1.001 |
| Adequate | 12 (100.0%) | 11 (91.7%) | 23 (95.8%) |  |
| Inadequate | 0 (0.0%) | 1 (8.3%) | 1 (4.2%) |  |
| **Results of Endoscopy** |  |  |  | 0.671 |
| Normal | 7 (58.3%) | 9 (75.0%) | 16 (66.7%) |  |
| Abnormal | 4 (33.3%) | 3 (25.0%) | 7 (29.2%) |  |
| Other | 1 (8.3%) | 0 (0.0%) | 1 (4.2%) |  |
| **2-4mm polyps** |  |  |  | 0.522 |
| N | 12 | 12 | 24 |  |
| Mean (SD) | 0.7 (1.8) | 0.6 (1.2) | 0.6 (1.5) |  |
| Median | 0.0 | 0.0 | 0.0 |  |
| Q1, Q3 | 0.0, 0.0 | 0.0, 1.0 | 0.0, 0.5 |  |
| Range | (0.0-6.0) | (0.0-4.0) | (0.0-6.0) |  |
| **5-9mm polyps** |  |  |  | 1.002 |
| N | 12 | 12 | 24 |  |
| Mean (SD) | 0.1 (0.3) | 0.1 (0.3) | 0.1 (0.3) |  |
| Median | 0.0 | 0.0 | 0.0 |  |
| Q1, Q3 | 0.0, 0.0 | 0.0, 0.0 | 0.0, 0.0 |  |
| Range | (0.0-1.0) | (0.0-1.0) | (0.0-1.0) |  |
| **≥10mm polyps** |  |  |  | 1.002 |
| N | 12 | 12 | 24 |  |
| Mean (SD) | 0.0 (0.0) | 0.0 (0.0) | 0.0 (0.0) |  |
| Median | 0.0 | 0.0 | 0.0 |  |
| Q1, Q3 | 0.0, 0.0 | 0.0, 0.0 | 0.0, 0.0 |  |
| Range | (0.0-0.0) | (0.0-0.0) | (0.0-0.0) |  |
| **Subjects with polyps >2mm** |  |  |  |  |
| No Polyps | 10 | 8 | 18 |  |
| Polyps | 2 (100.0%) | 4 (100.0%) | 6 (100.0%) |  |
| 1Fisher Exact    2Wilcoxon | | | | |
