# Supplementary material for: Bioactivity of Oral Linaclotide in Human Colorectum for Cancer Chemoprevention
Source: Oxford University Press journal article supplement (doi:10.1158/1940-6207.capr-16-0286), 2017-04-10
Supplement: 19406207capr160286-sup-174208_2_supp_3947128_4njmlk.docx [file 19406207capr160286-sup-174208_2_supp_3947128_4njmlk.docx]

**Supplementary Table 6. Incidence of adverse events by study stage**

|  | | | **Arm** | | | | | |
| --- | --- | --- | --- | --- | --- | --- | --- | --- |
| **Linaclotide** | | **Placebo** | | **Total** | |
| **N** | **%** | **N** | **%** | **N** | **%** |
| **Stage** | **System of Complaint** | **CTCAE Term** |  |  |  |  |  |  |
| **All Stages** | **Gastrointestinal** | **Abdominal distension** | 1 | 8.3% |  |  | 1 | 4.2% |
| **Abdominal pain** | 2 | 16.7% | 1 | 8.3% | 3 | 12.5% |
| **Bloating** | 1 | 8.3% | 3 | 25.0% | 4 | 16.7% |
| **Constipation** |  |  | 1 | 8.3% | 1 | 4.2% |
| **Diarrhea** | 7 | 58.3% | 7 | 58.3% | 14 | 58.3% |
| **Flatulence** |  |  | 4 | 33.3% | 4 | 16.7% |
| **Other** | 5 | 41.7% | 2 | 16.7% | 7 | 29.2% |
| **Nausea** | 1 | 8.3% |  |  | 1 | 4.2% |
| **Stomach pain** |  |  | 1 | 8.3% | 1 | 4.2% |
| **Vomiting** | 1 | 8.3% | 1 | 8.3% | 2 | 8.3% |
| **General** | **Fatigue** | 1 | 8.3% | 1 | 8.3% | 2 | 8.3% |
| **Infections and infestations** | **Infective Rhinitis** |  |  | 1 | 8.3% | 1 | 4.2% |
| **Nervous system** | **Headache** | 1 | 8.3% | 2 | 16.7% | 3 | 12.5% |
| **Respiratory, thoracic, mediastinal** | **Cough** | 2 | 16.7% |  |  | 2 | 8.3% |
| **Sore throat** | 1 | 8.3% |  |  | 1 | 4.2% |
| **Skin and subcutaneous tissue** | **Pain of skin** | 1 | 8.3% | 1 | 8.3% | 2 | 8.3% |
| **Pruritus** |  |  | 1 | 8.3% | 1 | 4.2% |
| **Other** |  |  | 2 | 16.7% | 2 | 8.3% |

All adverse events were grade 1
